# Supplementary material for: Early antibody response and clinical outcome in experimental canine leishmaniasis
Source: PubMed Central journal article supplement (PMC6901516; doi:10.1038/s41598-019-55087-w), 2019-12-09
Supplement: 41598_2019_55087_MOESM1_ESM.pdf [file 41598_2019_55087_MOESM1_ESM.pdf]

**SUPPLEMENTARY INFORMATION**

**Early antibody response and clinical outcome in experimental canine leishmaniasis**

**Ana Isabel Olías-Molero, María J. Corral, María Dolores Jiménez-Antón, José M<sup>a</sup> Alunda**

Department of Animal Health. Faculty of Veterinary Medicine, Complutense University of Madrid (UCM), Avda. Puerta de Hierro s/n, 28040 Madrid, Spain

Correspondence:

José M<sup>a</sup> Alunda

Email: [jmalunda@ucm.es](mailto:jmalunda@ucm.es)

## Legend to figures

**Supplementary Information Fig. 1:** Western blot analysis of SLA fractionated by electrophoresis under denaturing and reducing conditions (SDS-PAGE) probed with individual sera of uninfected control dogs at 5, 7, 10 and 16 weeks post infection (wpi). Numbers on the strips correspond to the identification of experimental dogs. Strips were cut from the membrane, developed and mounted. Incubation of strips and development conditions were standardized. Strip on the right: control protein transfer and MW markers, stained with Amido Black. MW: molecular weight markers in KDa.

**Supplementary Information Fig. 2:** Representative figures of reactivity determined by WB. Figure 1A: early responder dog (dog #20). Figure 1B: late responder dog (dog #13). Density corresponds to the output from ImageJ software. MW: Molecular weight in KDa.

**Supplementary Information Fig. 3:** Reactivity to individual antigens along the experimental infection of Beagle dogs 5 (Fig. 3A), 7 (Fig. 3B), 10 (Fig. 3C) and 16 (Fig. 3D) weeks post inoculation with *L.infantum*. Reactivity was determined with ImageJ software and output in density units (DU) transformed to color densities (heat map). Clinical score (CS), ELISAsla, ELISAp and IFAT results are included for comparative purposes using a color scale. Grey color cells: DU from these cells could not be differentiated. MW: molecular weight in KDa.

**Supplementary Information Fig. 4:** Relationship between total reactivity determined by WB and ELISA values using soluble *Leishmania* antigen (ELISA sla) (Fig. 4A) or promastigotes as antigen (ELISAp) (Fig. 4B) of dogs experimentally infected with *Leishmania infantum*. Black circles correspond to individual dogs' sera. DU: Density Units as determined by ImageJ.

**Supplementary Information Fig. 5:** Relationship between immunofluorescence antibody test (IFAT) titers and the clinical score (CS) of dogs experimentally infected with *L. infantum*. Black circles correspond to individual dogs on week 16 post infection.

**Supplementary Information Fig. 6:** Relationship between clinical score (CS) and ELISAsla (Fig. 6A) and ELISAp (Fig. 6B) of dogs experimentally infected with *L. infantum*. Black circles correspond to individual dogs on week 16 post infection.

**Supplementary Information Fig. 7:** Relationship between individual reactivity determined by WB and clinical score of dogs experimentally infected with *L. infantum*, 16 wpi. Black circles correspond to individual animals. DU: Density units as determined by ImageJ.

**Supplementary Information Fig. 8:** Relationship between the recognition of *L. infantum* antigens (85 +56-66 + 32 +30 KDa) and the clinical score of dogs experimentally infected with *L. infantum* on week 16 pi. DU: Density units as determined by Image J. Black circles correspond to individual dogs.

## Tables

**Supplementary Information Table 1:** Alignment of identified peptides by Mass Spectrometry and finger printing in the 2D-electrophoresis (in bold) and the sequences of proteins of *Leishmania* or trypanosomatids.

**Supplementary Information Table 2:** Clinical scoring (CS) of Beagle dogs experimentally infected with *Leishmania infantum* considering clinical signs and lesions (20 points) and hematological and biochemical abnormalities (15 points). Maximum Score: 35 points

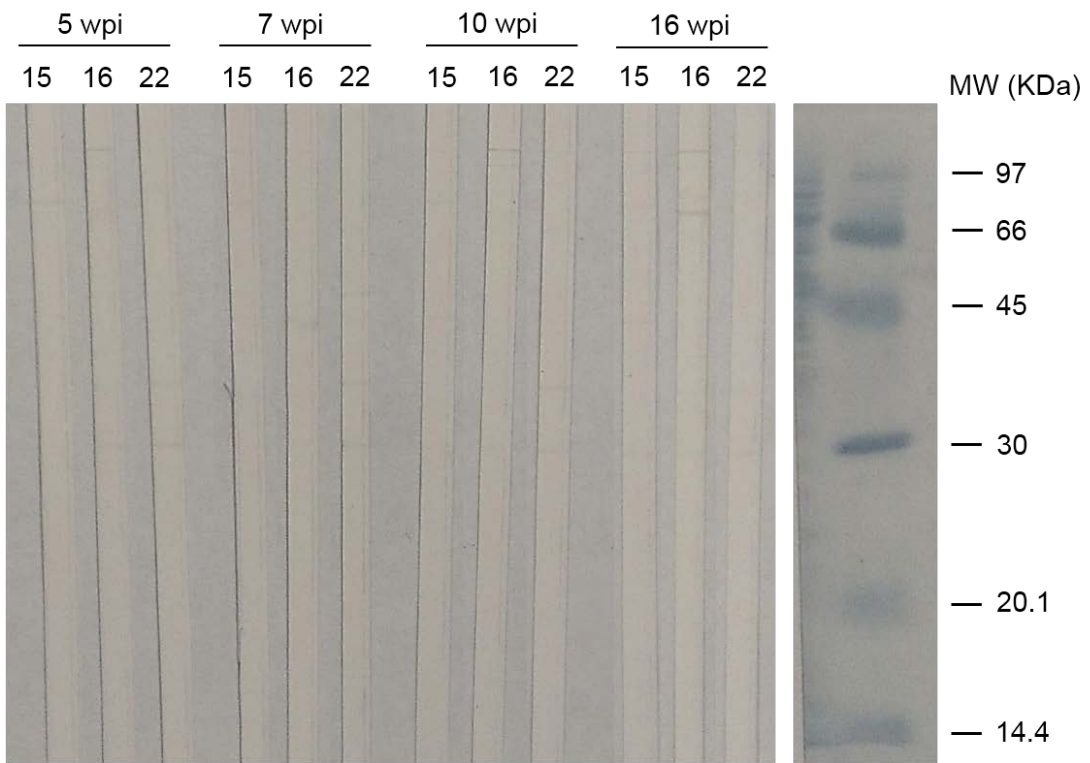

**Figure 1**

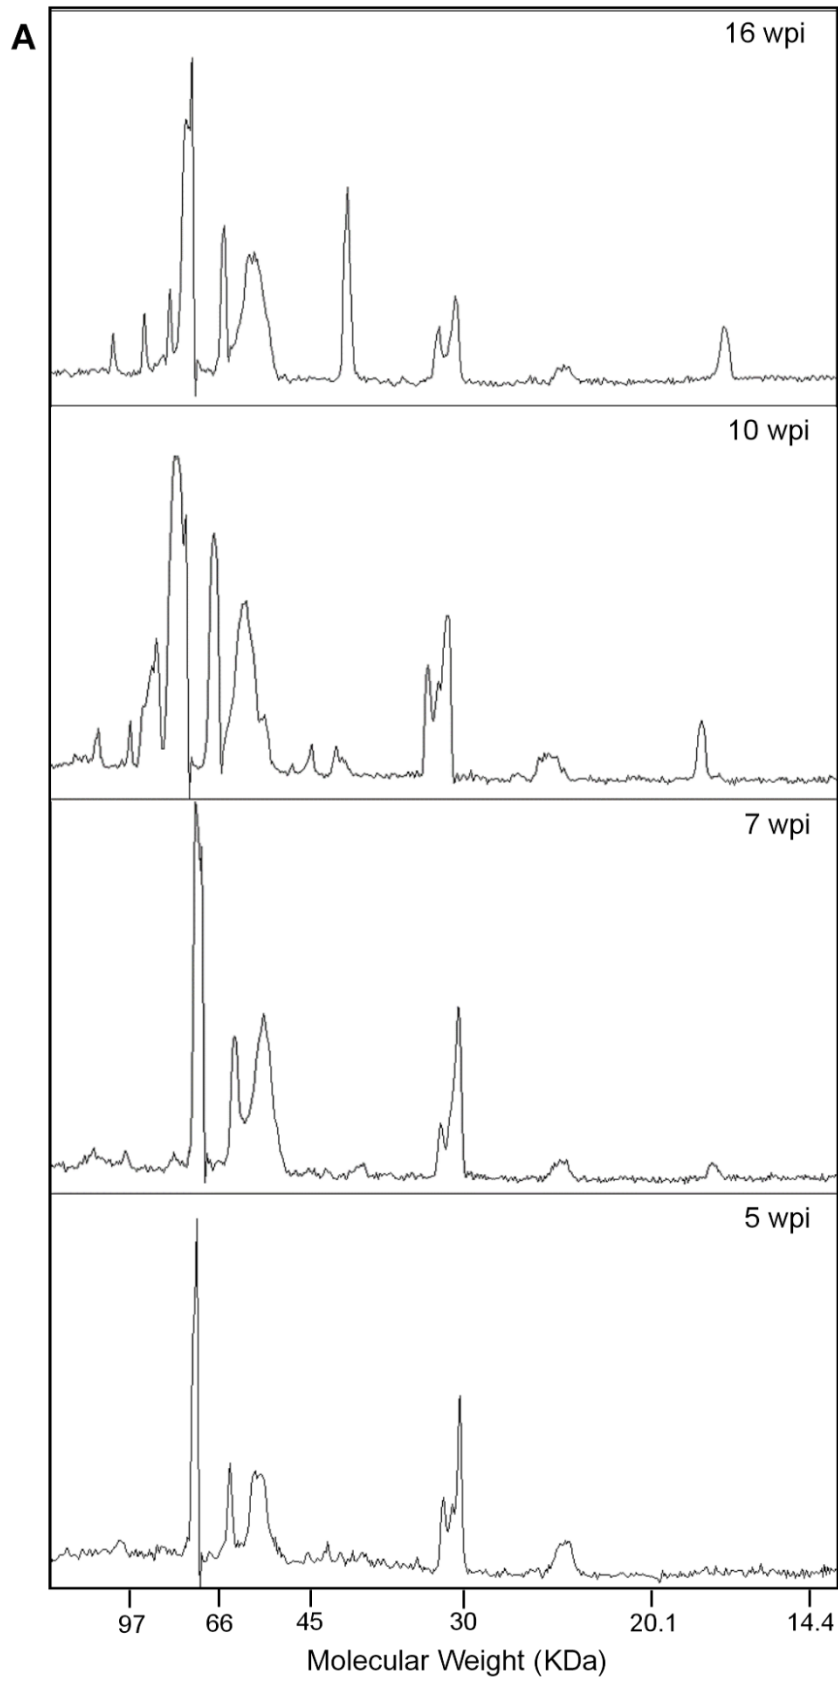

**SI Figure 2A**

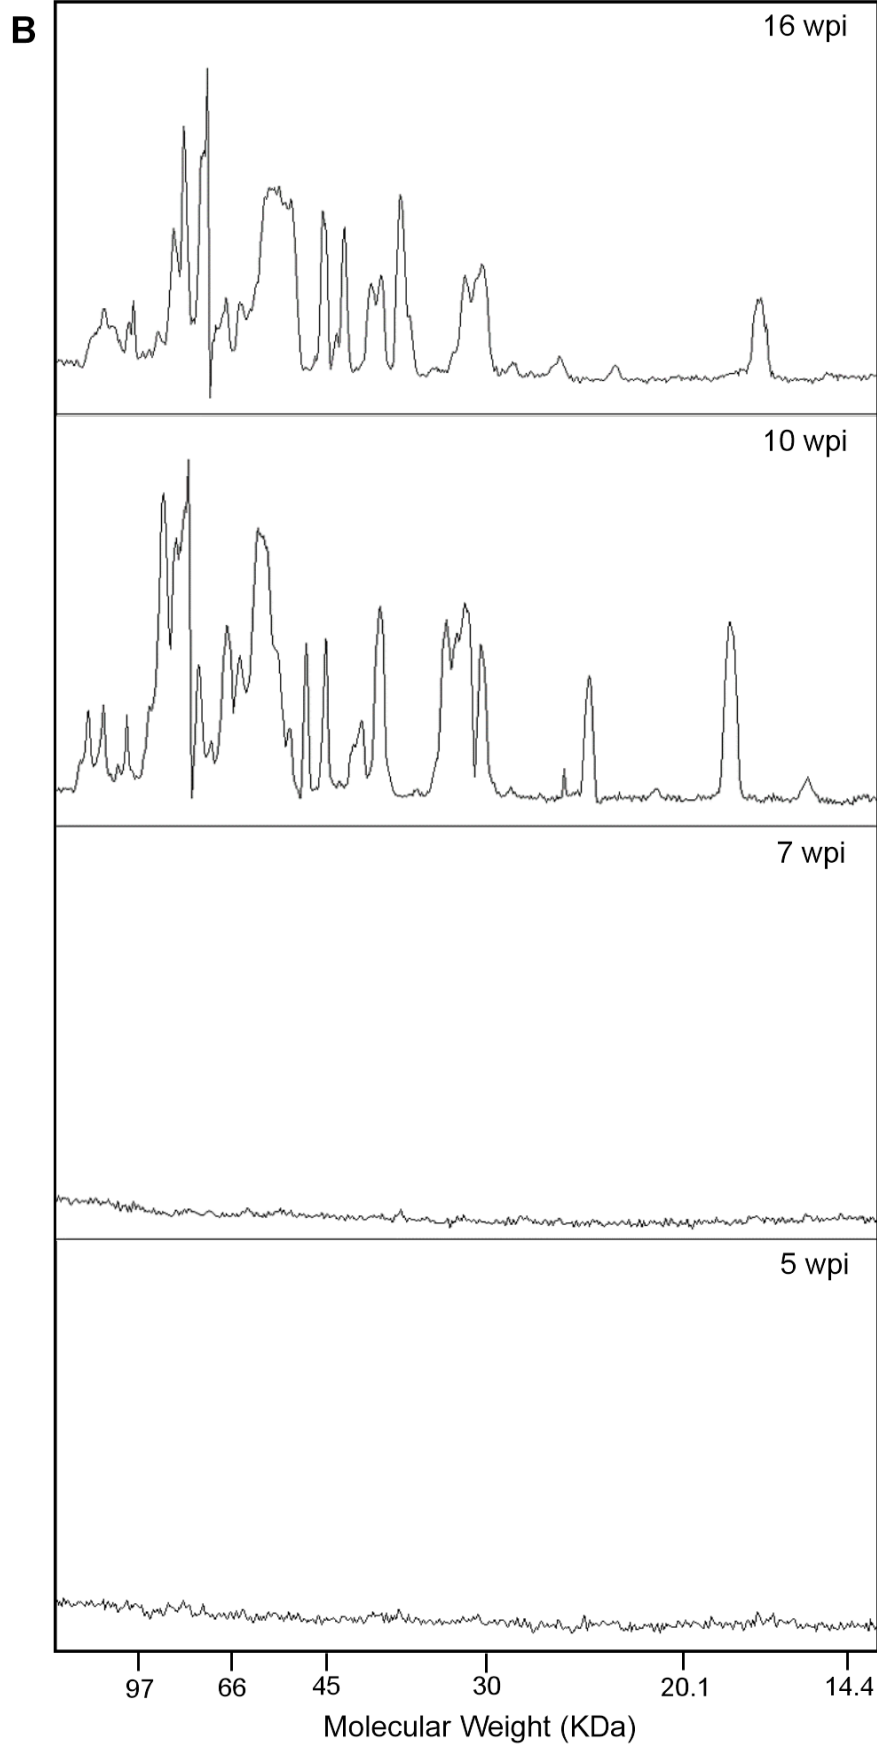

**SI Figure 2B**

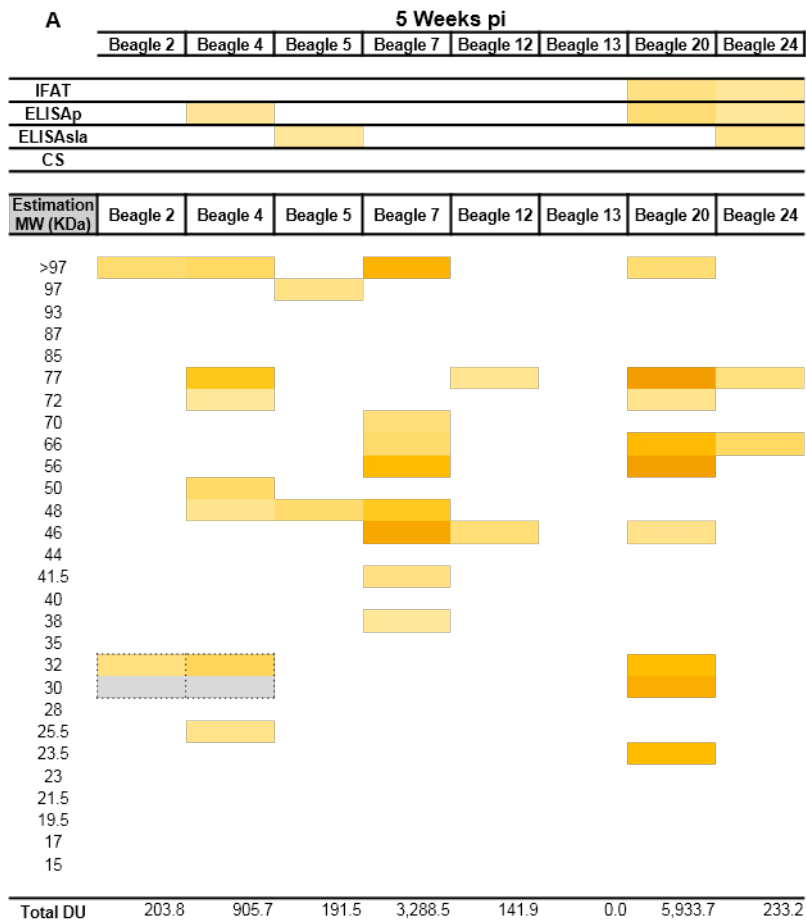

**SI Figure 3A**



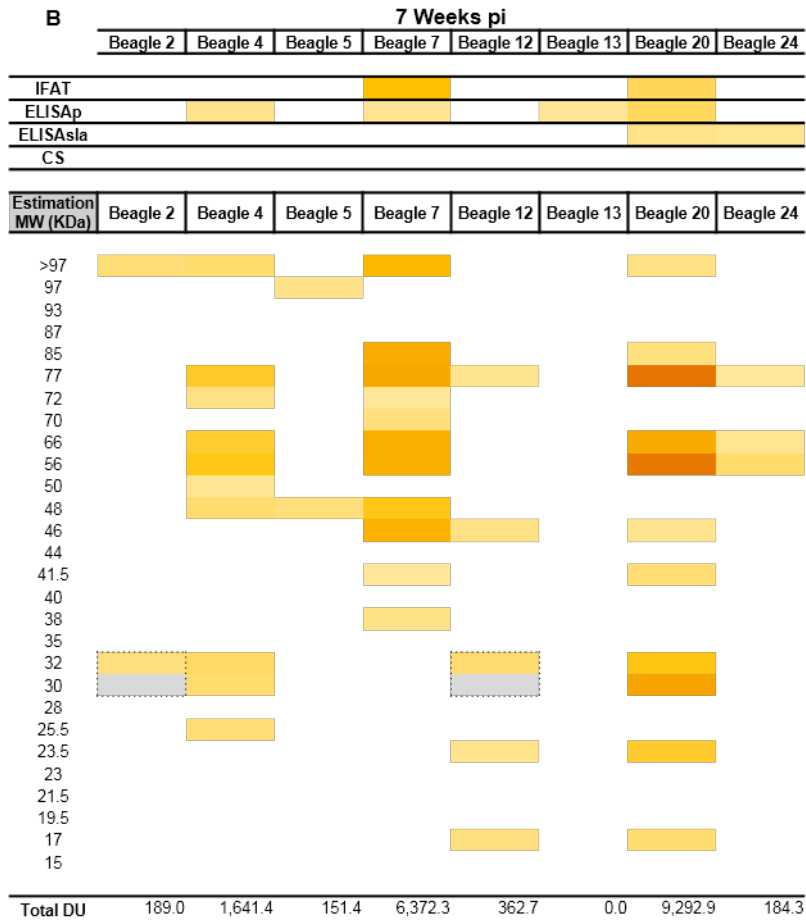

**SI Figure 3B**

C

10 Weeks pi

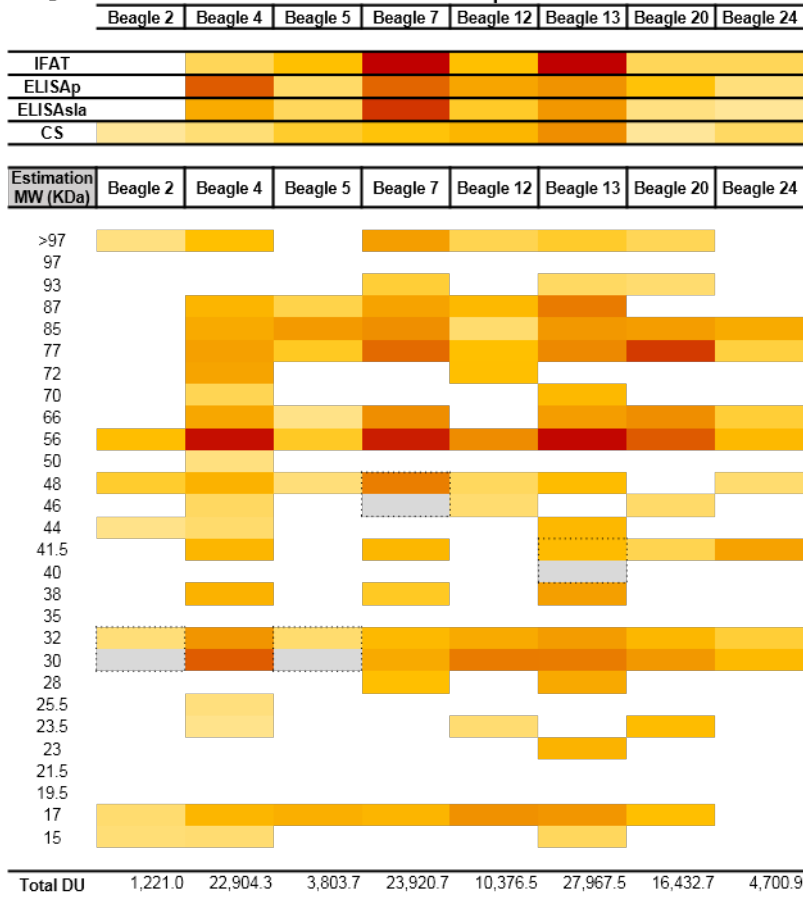

SI Figure 3C

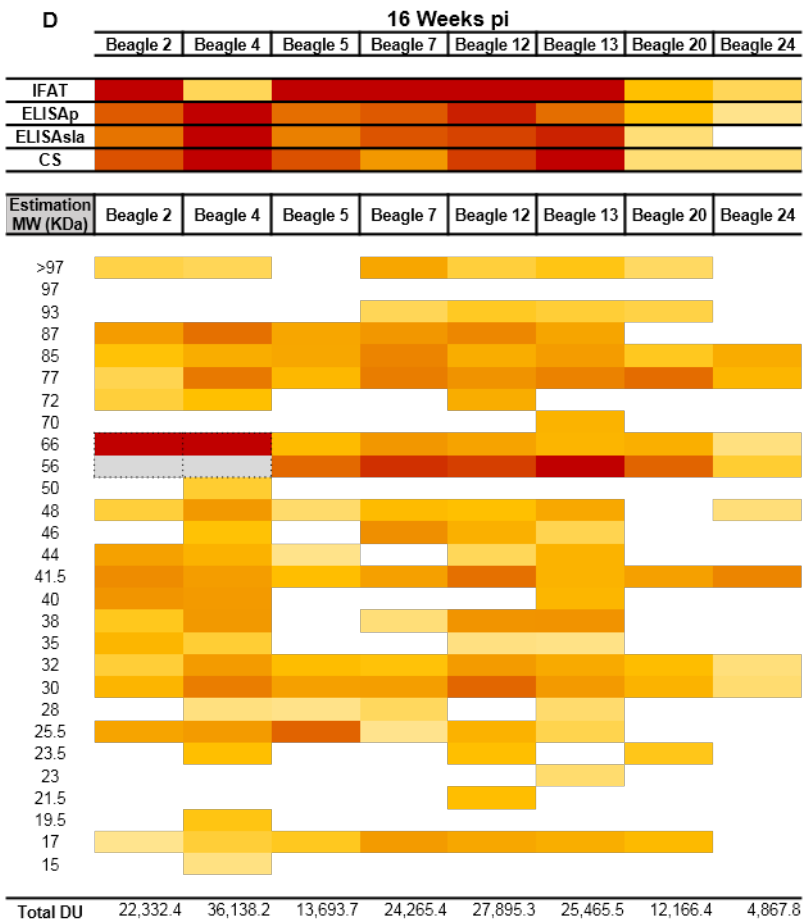

**SI Figure 3D**

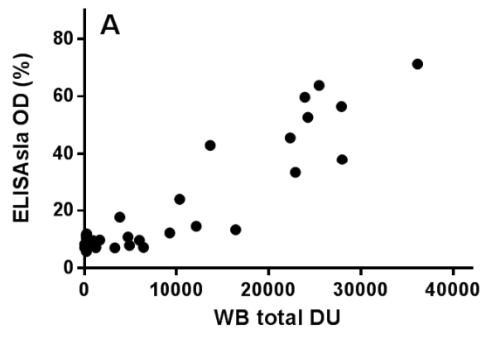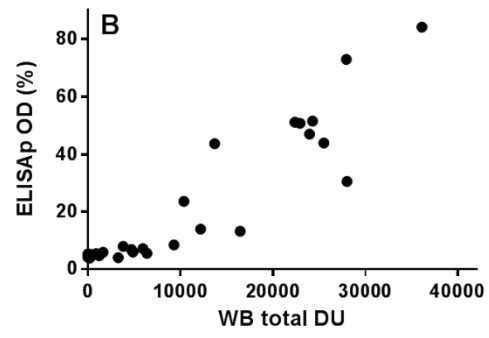

SI Figure 4

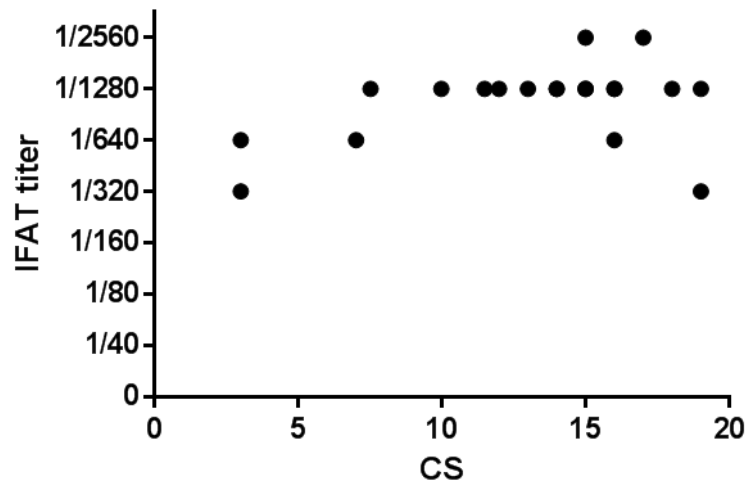

SI Figure 5

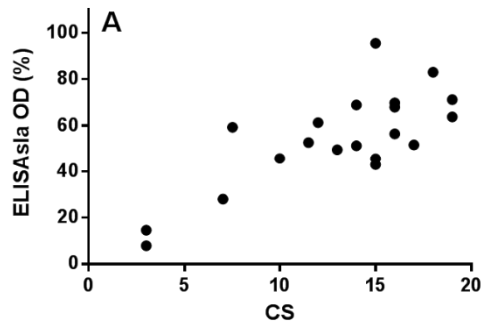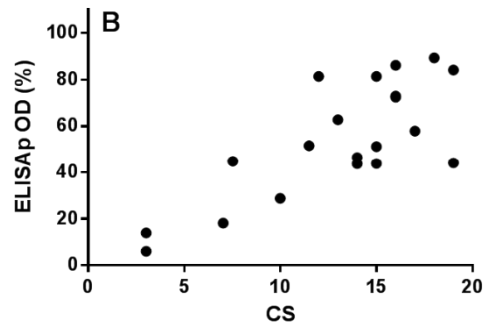

SI Figure 6

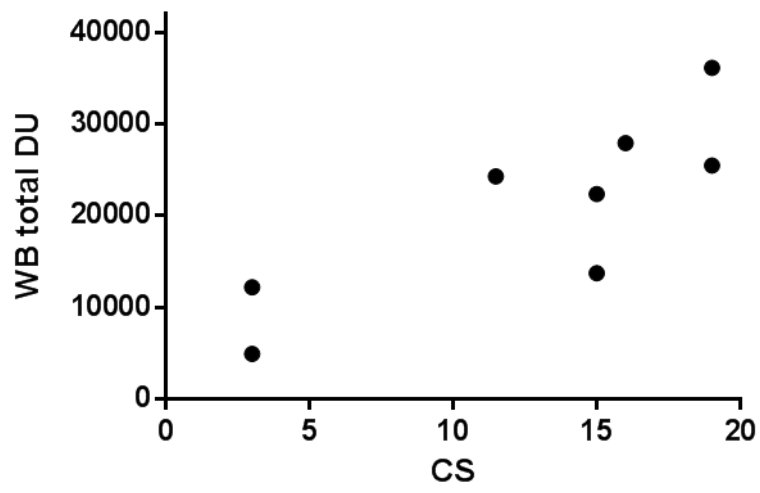

SI Figure 7

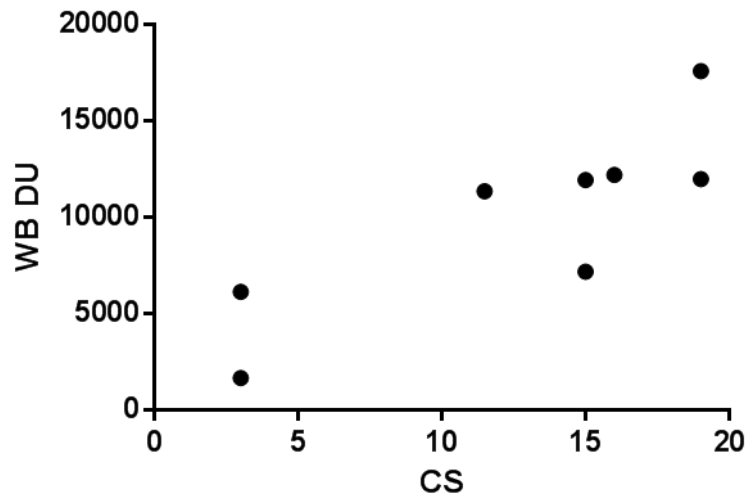

SI Figure 8



**SI Table 1:** Alignment of identified peptides by Mass Spectrometry and finger printing in the 2D-electrophoresis (in bold) and the sequences of proteins of *Leishmania* or trypanosomatids.

| Protein n° | Protein identification                   | Matched peptides                                                                                                                                                                                                                                                                                                                                                                                                                                                                                                                                                                                                                                                                                                                                                                                                                                                                                                                                                                                                                         |
|------------|------------------------------------------|------------------------------------------------------------------------------------------------------------------------------------------------------------------------------------------------------------------------------------------------------------------------------------------------------------------------------------------------------------------------------------------------------------------------------------------------------------------------------------------------------------------------------------------------------------------------------------------------------------------------------------------------------------------------------------------------------------------------------------------------------------------------------------------------------------------------------------------------------------------------------------------------------------------------------------------------------------------------------------------------------------------------------------------|
| 1          | Heat shock protein 83-1 (HSP 83)         | <p>1 SNKEIFLREL ISNASDACDK IRY<b>QSLTDPS</b> <b>VLGDETRLRI</b> RVIPDKANKT<br/> 51 LTVEDNGIGM TK<b>ADLVNNLG</b> <b>TIARSGTKAF</b> MEALEAGGDM SMIGQFGVGF<br/> 101 YSAYLVADRV TVVSKHNADE AYWESSAGG TFTIATVADS DLKRGTRITL<br/> 151 HLK<b>EDQQEYL</b> <b>EERRVKELIK</b> KHSEFIGYDI <b>ELLVEKTTEK</b> EVTDEDEEEK<br/> 201 KEGXNEEEPK VEEVKEGEED KKKTKKVKEV TKEYEIQNKH <b>KPLWTRDPKD</b><br/> 251 <b>VTKEEYAAFY</b> KAISNDWEDP AATKH<b>FSVEG</b> <b>QLEFRSILFV</b> PKRAP<b>FDMFE</b><br/> 301 <b>PNKKRNNIKL</b> YVRRVIMDN CEDLCPDWLG FVK<b>GVVDS</b><b>ED</b> <b>LPLNISRENL</b><br/> 351 QQNKILKVIR KNIVKKCLDL FEELSENKED FKQFYEQFGK NLK<b>LGIHEDT</b><br/> 401 <b>ANRKKLMELL</b> <b>RFASTESGEE</b> <b>LTTLKDYVTR</b> MKPEQ<b>SIYY</b> <b>ITGDSKKKLE</b><br/> 451 <b>SSPFIEEAKR</b> RGIEVLFMTE PIDEYV<b>MQQV</b> KDFEDKKFAC LTKEGVHFEE<br/> 501 SEDEKKKREE DKTAYEKLCK AMKEILGDKV EKVAVSERLS TSPCILTSE<br/> 551 FGWSAHMEQI MRNQALRDSS MAQYM<b>SKKT</b> MELNPGHPII RELRRR<b>VEAD</b><br/> 601 <b>ENDKAVKDLV</b> FLLFDTSLLT SGFQLDDPTG YAERINR</p> |
| 2          | Putative methylmalonyl-coenzyme A mutase | <p>1 MMRRCCILLA DAAAAGGGYP PEWIATAKKE LKRDPSTLVR HSINGFDIKP<br/> 51 LYLPELVKKV PNLPGFFPFT <b>RGVHATMYTG</b> <b>RPWTIRQYAG</b> <b>FSTAEESNNF</b><br/> 101 <b>YKAALSGQQ</b> GLSVAFDLAT HR<b>GYDS</b><b>DHPR</b> VTGDVGMAGV AVDTVEDMKL<br/> 151 LFKDIPLDKV <b>SVSMTMGGV</b> <b>IPILAFFAVA</b> <b>AEESGVPQAK</b> LRGTIQNDIL<br/> 201 KEFMVRNTYI FPPTPSMRII GDIMAYLNKN QPKFNSISIS GYHIQEAGAD<br/> 251 GALELAFTIA DGLEIIRCAE AR<b>GLTVDDVA</b> <b>PRLSFFF</b><b>GIG</b> <b>MNFYCEIAKL</b><br/> 301 RAARTLWATY VKKKFNPKNS KSLLLR<b>THSQ</b> <b>TSGW</b><b>SLTEQD</b> <b>MQNNIIRTTI</b><br/> 351 EAMAAMGGV QSLHTNAFDE AVALPSKQSS RTARNTQIII QEETHICGVV<br/> 401 DPWGGSYME ALTQEMIDRA <b>TAIEDVESK</b> GGMTKCIEEG FPCLKVEESA<br/> 451 <b>ARRQAAIDSG</b> <b>AETIVGVNKY</b> VNPDDKAPET LRIDNEKVRA GQIAGIQRVK<br/> 501 AARDTAKCEA ALKQVTAACK DNSINILDVA IVAARERATL GEITFAMEEV<br/> 551 YGRYVAKNVQ VQGVYYSTYV KDGSKKEQDY VGKIKARIDA YAAKEGRRPR</p>                                                                                                    |

|   |                                              |     |                   |                   |                   |                     |                    |
|---|----------------------------------------------|-----|-------------------|-------------------|-------------------|---------------------|--------------------|
|   |                                              | 601 | <b>IMVAKMGQDG</b> | HDRGAKVVAT        | GLADMGYDVD        | IGPLFQTPEE          | VARHAVENDV         |
|   |                                              | 651 | HIVGASSLAA        | GHRTLIPQLI        | QELKKLGADD        | IIVTAGGVIP          | PGDYQELYDA         |
|   |                                              | 701 | GVKMIFGPGT        | PIPKCADEMI        | TALEARQK          |                     |                    |
| 3 | Putative heat-shock protein hsp70 (Fragment) | 1   | MTFEGAIGID        | LGTTYSCVGV        | WQNERVDIIA        | NDQGNRTTPS          | YVAFDTSERL         |
|   |                                              | 51  | IGDAAKNQVA        | <b>MNPHTVFDA</b>  | <b>KRLIGRKFND</b> | SVVQSDMKHW          | PFKVTTKGDD         |
|   |                                              | 101 | KPVIQVYRG         | EKTFTPEEI         | SSMVLKMKKE        | TAEAYLGKQV          | <b>KKAVVTVPAY</b>  |
|   |                                              | 151 | <b>FNDSQRQATK</b> | <b>DAGTIAGLEV</b> | <b>LRIINEPTAA</b> | AIAYGLDKGD          | DGKERNVLIF         |
|   |                                              | 201 | DLGGGTFDVT        | LLTIDGGIFE        | VKATNGDTHL        | GGEDFDNRLV          | TFFTEEFKRK         |
|   |                                              | 251 | NKGKNLASSH        | RALRRLRTAC        | ERAKRTLSSA        | TQATIEIDAL          | FENVDFQATI         |
|   |                                              | 301 | TRARFEELCG        | <b>DLFRSTIQPV</b> | ERVLQDAKMD        | KRSVHDVVLV          | GGSTRIPKQV         |
|   |                                              | 351 | SLVSDFFGGK        | ELNKSINPDE        | AVAYGAAVQA        | FILTGGKSKQ          | TEGLLLLDVT         |
|   |                                              | 401 | PLTLGIETAG        | GVMTALIKRN        | TTIPTKKSQI        | <b>FSTYADNQPQ</b>   | <b>VHIQVFEGER</b>  |
|   |                                              | 451 | <b>AMTKDCHLLG</b> | <b>TFDLSGIPPA</b> | <b>PRGLPQIEVT</b> | <b>FDDL DANGILN</b> | <b>VSAAEEKGTGK</b> |
|   |                                              | 501 | <b>RNQITITNDK</b> | GRLSKDEIER        | MVNDAMKYEE        | DDKAQRDRVE          | AKNGLENYAY         |
|   |                                              | 551 | SMKNTLSDSN        | VSGKLESDK         | ATLNKEIDVV        | LEWLSSNQEAA         | AKEEYEHKQK         |
|   |                                              | 601 | ELESVCNPIM        | <b>TKMYQSMGGA</b> | <b>GGGMPGGMPD</b> | <b>MSGMSG</b>       |                    |
| 4 | Chaperonin HSP60, mitochondrial precursor    | 1   | MFRSAVRFGA        | <b>KDIRFGTEAR</b> | QSMLKGVQRA        | VDAVATTLGP          | KGRNVIIEQS         |
|   |                                              | 51  | YGAPKITKDG        | VTVAKSIEFK        | DPFENMGAQL        | VRQVCNKTND          | LAGDGTTTSA         |
|   |                                              | 101 | VLVASIFSEG        | <b>IKCIATGTNP</b> | <b>IDMKRGMDRA</b> | <b>VDVILKSIES</b>   | QSRKVTSTEN         |
|   |                                              | 151 | VVQVATISAN        | GDVELGKLIG        | EAMEKVGKDG        | <b>VITTQDGKTL</b>   | TTELEVVEGM         |
|   |                                              | 201 | SIDRGIISPY        | <b>FVTDAKTQKA</b> | ELEEAFVLVS        | AKKLSNIHTI          | LPALNHVRS          |
|   |                                              | 251 | GRPLLIADD         | VESEALTMI         | FNKLQGLKI         | ACVKAPGFGD          | NKAATLQDIA         |
|   |                                              | 301 | IFSGARVVE         | EGSGVELDAD        | NFDPDILGSV        | KKATITKDDT          | VLLNGGGDSG         |
|   |                                              | 351 | LVKERVLLR         | GLIENETSDY        | NREKLQERLG        | <b>KLSGGVAVIR</b>   | VGGASEVEVN         |
|   |                                              | 401 | <b>EKKDRITDAL</b> | <b>CSTRAAVQEG</b> | <b>IVPGGGAALL</b> | <b>RASKELEGLL</b>   | NDQSLTADQR         |
|   |                                              | 451 | TGVQIIRNAV        | RLPAHRIVSN        | SGREGAVVVE        | KVLENGDKAV          | <b>GYDAQLDRYV</b>  |
|   |                                              | 501 | NMFDAGIIDP        | ARVVRVALTD        | AASVASLMMT        | AEAAVVDLPK          | EDPPAAGGMG         |
|   |                                              | 551 | GMGGMGGMGG        | MGGMY             |                   |                     |                    |
| 5 | Elongation factor 1-alpha                    | 1   | MGKASFYAW         | <b>VLDKKAERE</b>  | <b>RGITIDIALW</b> | <b>KFESPKSVFT</b>   | <b>IIDAPGHRDF</b>  |
|   |                                              | 51  | <b>IKNMITGTSQ</b> | <b>ADAAILMIDS</b> | <b>TQGGFEAGIS</b> | <b>KDGQTREHAL</b>   | LAFTLGVKQM         |
|   |                                              | 101 | VVCCNKMDDK        | TVQYSQARYE        | EISKEVGTYL        | <b>KRVGYNPEKV</b>   | RFIPISGWQG         |
|   |                                              | 151 | DNMIDKSESM        | <b>AWYKGPTLLD</b> | <b>ALDMLEAPVR</b> | <b>PVDKPLRLPL</b>   | <b>QDVYKIGGIG</b>  |
|   |                                              | 201 | <b>TVPVGRVETG</b> | IMKPGDVVTF        | APANVTTEVK        | <b>SIEMHHEQLA</b>   | <b>EAVPGDNVGF</b>  |
|   |                                              | 251 | <b>NVKNVSVKDI</b> | RRGNVCGNSK        | NDPPKEAADF        | TAQVIVLNHP          | GQISNGYAPV         |

|   |                                              |     |                    |                   |                    |                   |                   |
|---|----------------------------------------------|-----|--------------------|-------------------|--------------------|-------------------|-------------------|
|   |                                              | 301 | LDCHTSHIAC         | RFADIESKID        | RRSGKELEKN         | PKAIKSGDAA        | IVKMVPQKPM        |
|   |                                              | 351 | <b>CVEVFNDYPP</b>  | <b>LGRFAVRDMR</b> | <b>QTVAVGIIKA</b>  | <b>VSKKDGSAK</b>  | <b>VTKAAAKAAK</b> |
|   |                                              | 401 | K                  |                   |                    |                   |                   |
| 6 | Enolase                                      | 1   | MTIQKVHARE         | ILDSRGNPTV        | EVEVTTDKGV         | FRSAVPSGAS        | TGVHEACEMR        |
|   |                                              | 51  | DEDKGRYCGK         | GCLKAVKNVN        | EVLGPALVGK         | DETQQEVLDK        | LMCDLDGTKN        |
|   |                                              | 101 | <b>KSKLGANAIL</b>  | <b>GCSMAISKAA</b> | AARLGLPLYQ         | YIAKIAGTKE        | IRLPVPCFNV        |
|   |                                              | 151 | <b>INGGKHAGNV</b>  | <b>LPFQEFMIAP</b> | <b>VKAKSFREGL</b>  | <b>QMGAEVYHAL</b> | <b>KSILKKKYGQ</b> |
|   |                                              | 201 | DAVNVGDEGG         | FAPPIAHIDE        | PLPILMEAIE         | KAGHKDRFAI        | CMDCAASEAY        |
|   |                                              | 251 | DADKKQYNMT         | FKSAEPTYVS        | GEGLLKTYEK         | WATNYPIKSI        | EDPFSEDNFD        |
|   |                                              | 301 | EFAAITKALE         | GKVQIVGDDL        | <b>TVTINVERVKM</b> | AIEKKACNSL        | LLKVNQIGTV        |
|   |                                              | 351 | SESIAAARLC         | <b>MDNGWSVMVS</b> | <b>HRSGETEDTY</b>  | IADLSVGLGT        | GQIKTGAPCR        |
|   |                                              | 401 | <b>SERTAKMNQL</b>  | <b>LRIEEELGAS</b> | SKYGFPAWA          |                   |                   |
| 7 | Putative heat shock protein DNAJ             | 1   | MVAETKYYDA         | <b>LGVSPATED</b>  | <b>EIKRAYRCLA</b>  | LKYHPDKNKE        | <b>PGAQEKFKEV</b> |
|   |                                              | 51  | <b>SVAYECLSDP</b>  | <b>EKRKLYDQFG</b> | DKGEGMESGI         | DPSDIFASFF        | GGGTRSRGEP        |
|   |                                              | 101 | KPKDIIHELP         | VSLDAFYTGK        | TVKLAI TRDR        | LCTKCSGTGS        | KIPNASIKCR        |
|   |                                              | 151 | ECNRRGVRMI         | TRQIGPGFIQ        | QMQVTC PACQ        | GKGTSLKEED        | KCEVCRGQQT        |
|   |                                              | 201 | IKDKKIFEVV         | VDKGMHRGDS        | VTFRGEDQI          | PDVRLSGDII        | IIFEQKPHPT        |
|   |                                              | 251 | FIRKGNHLFI         | ERSISLAEAL        | TGFSFNITHL         | <b>DNRKLKIQSP</b> | <b>EGMVVDPANM</b> |
|   |                                              | 301 | <b>YSVHREGMPV</b>  | <b>PNTGGVEKGD</b> | <b>LVIKFNVFP</b>   | <b>KKMEQSLIPN</b> | <b>LRSTLGYPHQ</b> |
|   |                                              | 351 | PKSDHDSEMC         | ILQETKIDLE        | KESRRNAYDD         | DGDDNRPRGH        | TTTCAQQ           |
| 8 | Arginine kinase (AK)                         | 1   | MASPDVIAKL         | DAAFSKLQNA        | <b>SDCNLLKKH</b>   | <b>LTKNVFEEIK</b> | GRKTKLGATL        |
|   |                                              | 51  | LDVIQSGVAN         | LDSGVGLYAP        | DAESYTVFAP         | LFDPVIEDYH        | KGFKPSDRQP        |
|   |                                              | 101 | PKDFGDLSTL         | VDVDPDNKYV        | LSTRVRCGRS         | LEGYPFNPCL        | TKAQYEEMES        |
|   |                                              | 151 | <b>RVKEQLSTMT</b>  | <b>GELQGCYYPL</b> | <b>TGMTKETQOK</b>  | LIDDHFLFKE        | GDRFLQAARA        |
|   |                                              | 201 | CEHWPTGRGI         | YHNENKTFLV        | <b>WVNEEDHLRI</b>  | ISMQKGGNLK        | EVFGRLVTAV        |
|   |                                              | 251 | GIIEQKVKFS         | RDDRLGFLTF        | <b>CPTNLGTTIR</b>  | ASVHIKLPKL        | GADRAKLEEV        |
|   |                                              | 301 | AAKYSLQVRG         | TAGEHSDSPD        | GVYDISNKRR         | <b>LGLSEYQAVK</b> | EMQDGILELI        |
|   |                                              | 351 | KIEQSLDGNQ         | DDNALHNFFR        | SLSKI              |                   |                   |
| 9 | Putative glutathione peroxidase-like protein | 1   | MSIYDFKVNG         | GDHKPYDLGQ        | HK <b>GHPVLIYN</b> | <b>VASKCGFTKG</b> | <b>GYETATALYN</b> |
|   |                                              | 51  | <b>KYKHQGF TVL</b> | <b>AFPCNQFASQ</b> | <b>EPGTEESVKE</b>  | <b>FACTRFKAEF</b> | <b>PIMEKVCVNG</b> |
|   |                                              | 101 | EHEHPLYHYL         | <b>KNTCKGVLGT</b> | <b>TLVKWNFTAF</b>  | LVDKDGHAVC        | RFAPGATMSE        |
|   |                                              | 151 | IEKRLVPLLE         | ADGDASTAPL        | STQA               |                   |                   |

---

**Supporting Information Table 2:** Clinical scoring (CS) of Beagle dogs experimentally infected with *Leishmania infantum* considering clinical signs and lesions (20 points) and hematological and biochemical abnormalities (15 points). Maximum Score: 35 points

| Clinical signs & Lesions |                                                                                                                                                                                                                                                                                                                                                                                                                      | Severity score     |                                               |                                                              |                                |
|--------------------------|----------------------------------------------------------------------------------------------------------------------------------------------------------------------------------------------------------------------------------------------------------------------------------------------------------------------------------------------------------------------------------------------------------------------|--------------------|-----------------------------------------------|--------------------------------------------------------------|--------------------------------|
|                          |                                                                                                                                                                                                                                                                                                                                                                                                                      | 0                  | 1                                             | 2                                                            | 3                              |
| Lymphadenomegaly         | Enlargement of palpable lymph nodes (LN) <ul style="list-style-type: none"> <li>▪ Popliteal LN</li> <li>▪ Retropharyngeal LN</li> <li>▪ Prescapular LN</li> </ul>                                                                                                                                                                                                                                                    | 0 (Normal)         | 1 (1 palpable LN, localized lymph.)           | 2 (> 1 palpable LN, mild lymph.)                             | 3 (generalized, severe lymph.) |
| Splenomegaly             | Spleen enlargement as determined by palpation                                                                                                                                                                                                                                                                                                                                                                        | 0 (absence)        | 1 (slight)                                    | 2 (moderate)                                                 | 3 (severe)                     |
| Cutaneous lesions        | <ul style="list-style-type: none"> <li>▪ Non-pruritic dry exfoliative dermatitis</li> <li>▪ Alopecia (periocular/ focal/ generalized)</li> <li>▪ Erythema</li> <li>▪ Ulcerative dermatitis</li> <li>▪ Nodular dermatitis</li> <li>▪ Papular dermatitis</li> <li>▪ Pustular dermatitis</li> <li>▪ Intertrigo</li> <li>▪ Onychogryphosis</li> <li>▪ Nasal and/or footpad hyperkeratosis</li> <li>▪ Pyoderma</li> </ul> | 0 (Normal)         | 1 (localized or mild lesions and/or alopecia) | 2 (multifocal or generalized lesions and/or severe alopecia) | -                              |
| Weight loss              | <ul style="list-style-type: none"> <li>▪ % decrease of body weight</li> </ul>                                                                                                                                                                                                                                                                                                                                        | 0 (absence)        | 1 (slight < 5%)                               | 2 (moderate 5-10 %)                                          | 3 (severe ≥ 10 %)              |
| Body condition loss      | As classified by the veterinarian                                                                                                                                                                                                                                                                                                                                                                                    | 0 (Normal)         | 1 (poor) condition)                           | 2 (emaciation)                                               | 3 (cachexia)                   |
| Mucosal pallor           | <ul style="list-style-type: none"> <li>▪ Oral mucosa</li> <li>▪ Vulvar mucosa</li> </ul>                                                                                                                                                                                                                                                                                                                             | 0 (pink and moist) | 1 (pale mucosa)                               | -                                                            | -                              |
| Hyperthermia             | <ul style="list-style-type: none"> <li>▪ Fever (&gt; 39°C)</li> </ul>                                                                                                                                                                                                                                                                                                                                                | 0 (absence)        | 1 (presence)                                  | -                                                            | -                              |
| Ocular lesions           | <ul style="list-style-type: none"> <li>▪ Blepharitis (exfoliative, ulcerative, or nodular) and conjunctivitis (nodular)</li> <li>▪ Keratoconjunctivitis, either common or sicca</li> <li>▪ Anterior uveitis/endophthalmitis</li> </ul>                                                                                                                                                                               | 0 (absence)        | 1 (presence)                                  | -                                                            | -                              |
| Gastrointestinal signs   | <ul style="list-style-type: none"> <li>▪ Diarrhea</li> <li>▪ Vomiting</li> </ul>                                                                                                                                                                                                                                                                                                                                     | 0 (absence)        | 1 (presence)                                  | -                                                            | -                              |
| Muscular Atrophy         | <ul style="list-style-type: none"> <li>▪ Masticatory muscle atrophy (temporal muscle)</li> </ul>                                                                                                                                                                                                                                                                                                                     | 0 (absence)        | 1 (presence)                                  | -                                                            | -                              |
| Joints                   | <ul style="list-style-type: none"> <li>▪ Lameness</li> <li>▪ Joint pain</li> </ul>                                                                                                                                                                                                                                                                                                                                   | 0 (absence)        | 1 (presence)                                  | -                                                            | -                              |
|                          |                                                                                                                                                                                                                                                                                                                                                                                                                      |                    |                                               | <b>TOTAL SCORE</b>                                           | <b>20</b>                      |

| <b>Hematological and Biochemical abnormalities</b> |                                                                                                                                                                                    |                           |                             |                                              |           |
|----------------------------------------------------|------------------------------------------------------------------------------------------------------------------------------------------------------------------------------------|---------------------------|-----------------------------|----------------------------------------------|-----------|
| Anemia                                             | <ul style="list-style-type: none"> <li>▪ Hematocrit value (&lt;38.3%)</li> <li>▪ Reticulocytes cell count (&lt;110000 cells/<math>\mu</math>L): non regenerative anemia</li> </ul> | 0 (absence)               | 1 (mild to moderate anemia) | 2 (mild to moderate non regenerative anemia) | -         |
| Thrombocytopenia                                   | <ul style="list-style-type: none"> <li>▪ Platelets (&lt;143000/<math>\mu</math>L)</li> </ul>                                                                                       | 0 (absence)               | 1 (presence)                | -                                            | -         |
| Leucopenia                                         | <ul style="list-style-type: none"> <li>▪ Leucocytes (&lt;4900/<math>\mu</math>L)</li> </ul>                                                                                        | 0 (absence)               | 1 (presence)                | -                                            | -         |
| Neutrophilia                                       | <ul style="list-style-type: none"> <li>▪ Band neutrophils (&gt;170 cells/<math>\mu</math>L)</li> </ul>                                                                             | 0 (absence)               | 1 (presence)                | -                                            | -         |
| Increased total proteins                           | <ul style="list-style-type: none"> <li>▪ Proteins spectrophotometry (&gt; 7.8 g/dL)</li> </ul>                                                                                     | 0 (absence)               | 1 (presence)                | -                                            | -         |
| Globulinemia                                       | <ul style="list-style-type: none"> <li>▪ Globulins (&gt; 4.4 g/dL)</li> </ul>                                                                                                      | 0 (absence)               | 1 (presence)                | -                                            | -         |
| Hypoalbuminemia                                    | <ul style="list-style-type: none"> <li>▪ Albumin (&lt; 2.7 g/dL)</li> </ul>                                                                                                        | 0 (absence)               | 1 (presence)                | -                                            | -         |
| Decreased albumin/globulin ratio                   | <ul style="list-style-type: none"> <li>▪ Ratio A/G &lt; 0.7</li> </ul>                                                                                                             | 0 (normal: A/G = 0.7-1.9) | 1 (A/G= 0.7-0.35)           | 2 (A/G < 0.35)                               |           |
| Renal impairment or renal disease                  | <ul style="list-style-type: none"> <li>▪ Blood creatinine concentration (&gt; 1.5 mg/dL)</li> </ul>                                                                                | 0 (normal)                | 1 (presence)                |                                              |           |
|                                                    | <ul style="list-style-type: none"> <li>▪ Blood Urea Nitrogen (&gt; 59 mg/dL)</li> </ul>                                                                                            | 0 (absence)               | 1 (presence)                |                                              |           |
|                                                    | <ul style="list-style-type: none"> <li>▪ SDMA (symmetric dimethylamine) biomarker of renal function (&gt; 14 <math>\mu</math>g/dL)</li> </ul>                                      | 0 (absence)               | 1 (presence)                |                                              |           |
| Increased liver enzymes                            | GOT (AST) (> 89 UI/dL)                                                                                                                                                             | 0 (absence)               | 1 (presence)                |                                              |           |
|                                                    | GPT (ALT) (> 89 UI/dL)                                                                                                                                                             | 0 (absence)               | 1 (presence)                |                                              |           |
|                                                    |                                                                                                                                                                                    |                           |                             | <b>TOTAL SCORE</b>                           | <b>15</b> |
